# Supplementary material for: Gasdermin D promotes influenza virus-induced mortality through neutrophil amplification of inflammation
Source: PubMed Central journal article supplement (PMC10980740; doi:10.1038/s41467-024-47067-0), 2024-03-29

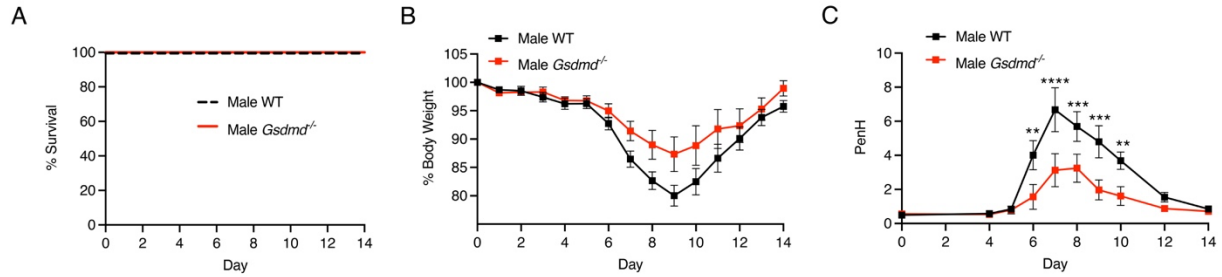

**Supplementary Figure 1: Male *Gsdmd*<sup>-/-</sup> mice experience decreased lung dysfunction in IAV infection.** **A-C** Male WT and *Gsdmd*<sup>-/-</sup> mice were intranasally infected with 50 TCID<sub>50</sub> of IAV strain PR8. **A** Survival curve from 2 independent experiments with n=9 WT, n=11 *Gsdmd*<sup>-/-</sup>. No fatalities were observed in either group. **B** Weight loss measurement following IAV infection (each dot is an average of individual mouse weights normalized to 100% relative to day 0, error bars indicate SEM, n=9 WT, n=11 *Gsdmd*<sup>-/-</sup> from 2 independent experiments, statistical significance not achieved at any timepoint by two-way ANOVA with Bonferroni's Multiple Comparison's test). **C** PenH measurements (each dot is an average of individual mouse PenH values, error bars indicate SEM, n=9 WT, n=11 *Gsdmd*<sup>-/-</sup> from 2 independent experiments), \*\*p < 0.01, \*\*\*p < 0.001, \*\*\*\*p < 0.0001 by two-way ANOVA with Bonferroni's Multiple Comparison's test).

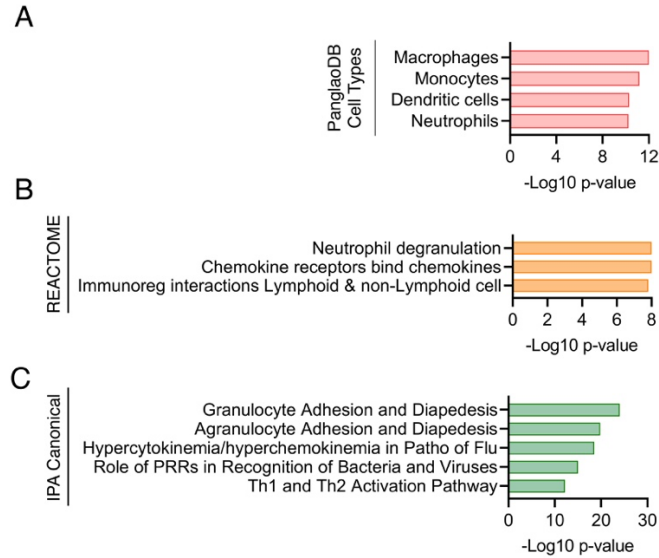

**Supplementary Figure 2: Pathway analysis of gene signatures downregulated in *Gsdmd*<sup>-/-</sup> versus WT mice.** **A-C** Differentially expressed genes in day 7 post infection *Gsdmd*<sup>-/-</sup> lungs versus WT (n=3 per group) were subjected to pathway and cell type analysis. **A** Downregulated genes in *Gsdmd*<sup>-/-</sup> versus WT lungs were subjected to PanglaoDB analysis and all significant associations with specific cell types are shown. **B** Significant REACTOME gene set enrichments ( $p < 0.05$  by Gene Set Enrichment Analysis) for all downregulated genes in *Gsdmd*<sup>-/-</sup> versus WT lungs. **C** All differentially expressed genes were examined using Ingenuity Pathway Analysis and the top five most significant Canonical Pathways are shown.

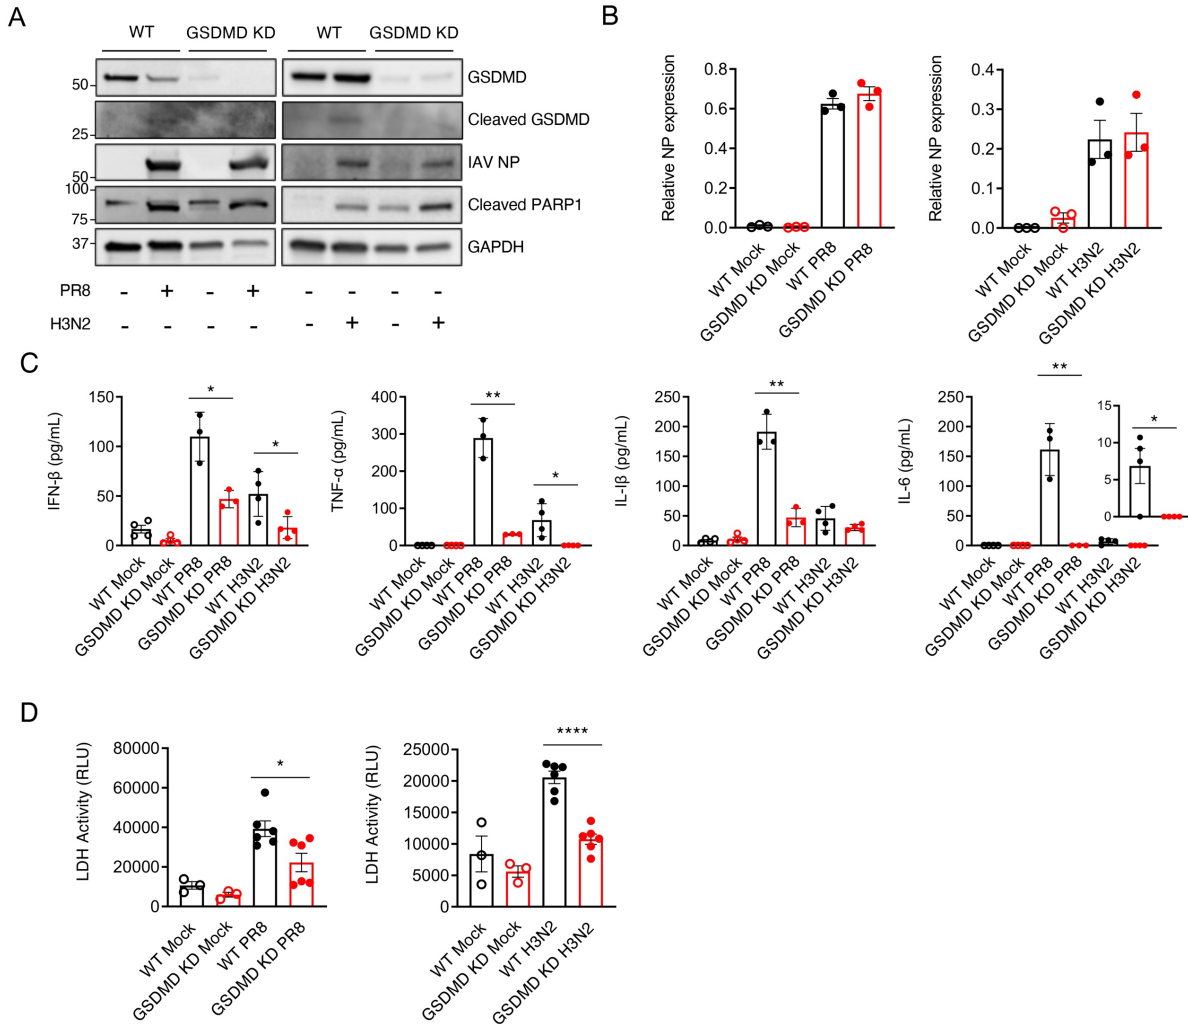

**Supplementary Figure 3: Human GSDMD promotes secretion of pro-inflammatory cytokines in THP-1 macrophages *in vitro*.** **A** Representative western blots for PMA-differentiated WT and GSDMD knockdown (KD) human THP-1 macrophages 48 hours post infection with PR8 or H3N2 at an MOI of 10. Results are representative of at least 3 experiments. **B** Densitometry quantification of NP levels relative to GAPDH as in **A** from 3 experiments. **C** ELISA quantification of IL-6, IFN- $\beta$ , IL-1 $\beta$ , or TNF- $\alpha$  levels in supernatants from cells infected as in **A** (each dot represents an average result from 1 of at least 3 experiments, \* $p < 0.05$ , \*\* $p < 0.01$  by two-way ANOVA with Tukey's multiple comparisons test). **D** Relative extracellular lactate dehydrogenase (LDH) levels quantified in supernatants of infected cells as in **A** via luminescence-based assay (RLU, relative light units,  $n=3$  mocks from 1 experiment and  $n=6$  infected samples from 2 experiments, \* $p < 0.05$ , \*\*\*\* $p < 0.0001$  by two-way ANOVA with Tukey's multiple comparisons test, only comparisons of interest are shown).

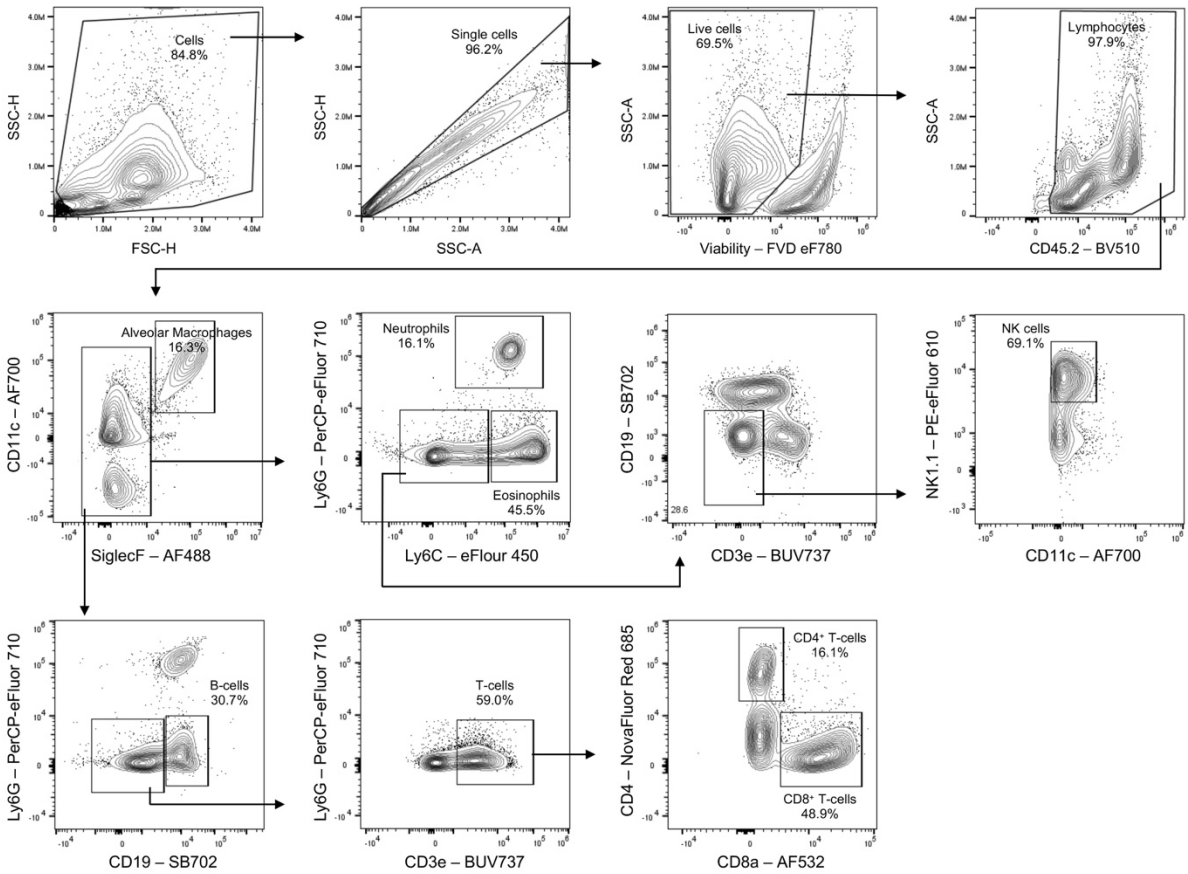

**Supplementary Figure 4: Gating strategy for quantifying immune cell recruitment to mouse lungs during IAV infection.** In addition to Fixable Viability Dye-eFluor 780, antibody target-fluorophore conjugates include: CD45.2-BV510, CD11c-AF700, SiglecF-AF488, Ly6C-eFluor 450, Ly6G-PerCP-eFluor 710, CD19-SB702, CD3e-BUV737, NK1.1-PE-eFluor 780, CD4-NovaFluor Red 685, CD8a-SB780.

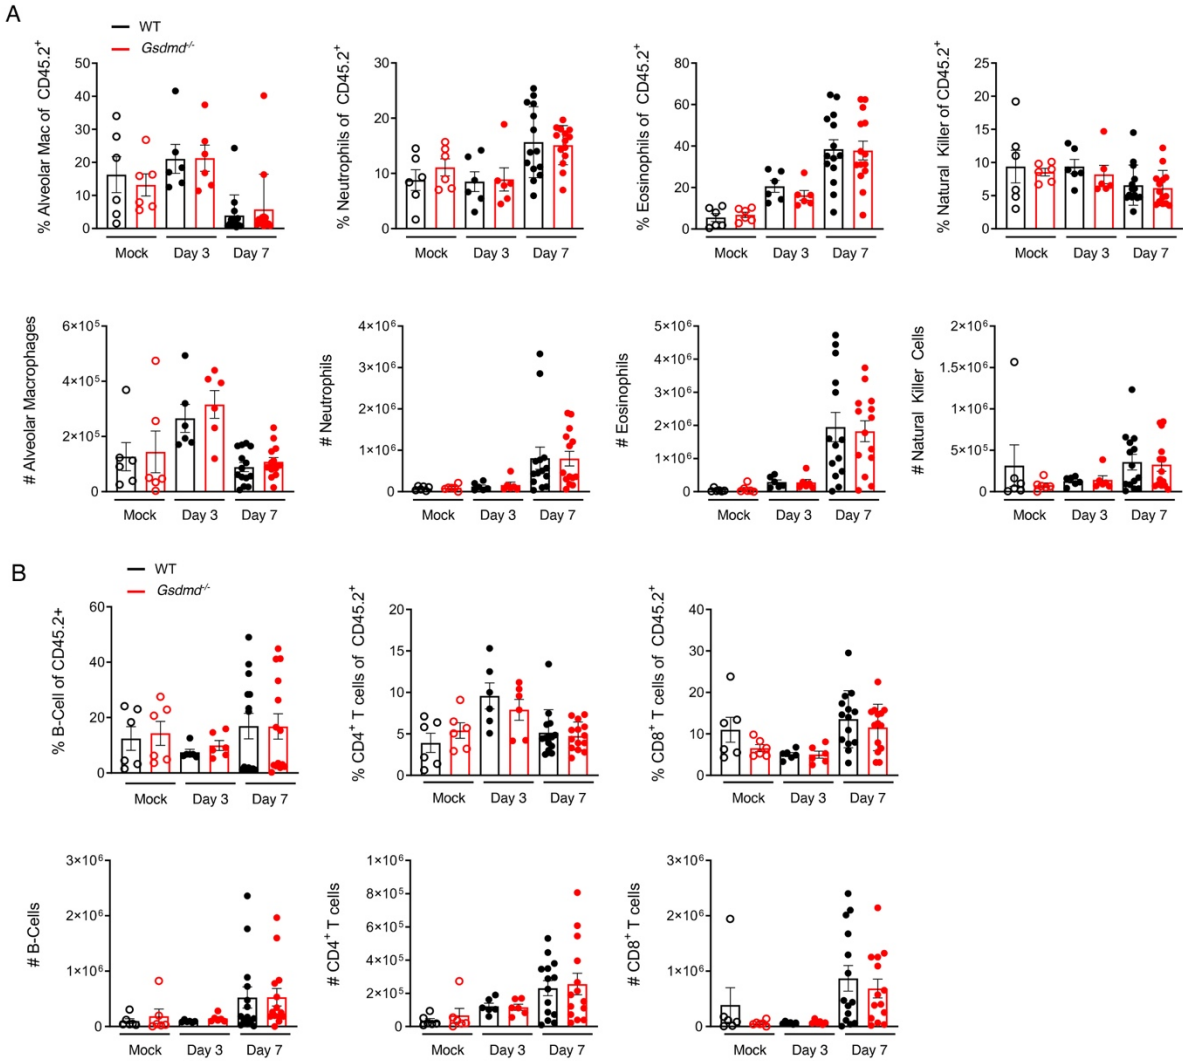

**Supplementary Figure 5: GSDMD does not affect immune cell recruitment to the lung during IAV infection.** A-B WT and *Gsdmd*<sup>-/-</sup> mice were infected with 50 TCID<sub>50</sub> of IAV strain PR8. Analysis was done on day 3 or 7 post infection using the flow cytometry gating strategy show in Supplementary Figure 4. Percentage (%) of the indicated cell type relative to all CD45.2<sup>+</sup> immune cells and total cell numbers (#) are graphed. Data for innate immune cells (A) and adaptive immune cells (B) are pooled from two separate experiments for mocks and day 3 animals (n=6) and from 3 separate experiments for day 7 animals (n=14). Each dot represents an individual mouse and error bars indicate SEM. No significant differences between WT and *Gsdmd*<sup>-/-</sup> samples for mocks or on day 3 or day 7 were detected by ANOVA with Tukey's multiple comparisons test for any cell type % or #. Neutrophil # data is repeated from Fig 5C in the main text.

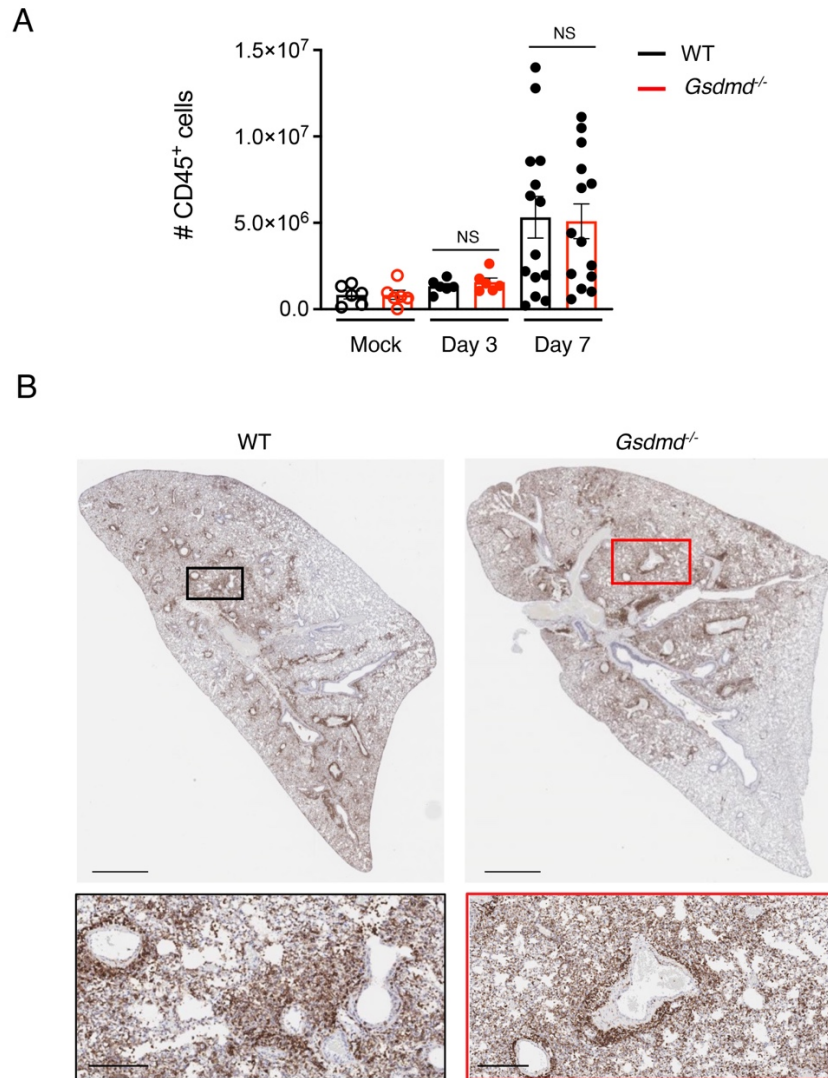

**Supplementary Figure 6: CD45<sup>+</sup> immune cells are present in IAV-infected lungs independent of GSDMD.** WT and *Gsdmd*<sup>-/-</sup> mice were intranasally infected with 50 TCID<sub>50</sub> of IAV strain PR8. **A** Flow Cytometry analysis was done on day 3 or 7 post infection gating strategy show in Supplementary Figure 4. Cell numbers (#) are graphed. Data are pooled from two separate experiments for mocks and day 3 animals (n=6) and from 3 separate experiments for day 7 animals (n=14). Each dot represents an individual mouse and error bars indicate SEM. No significant differences between WT and *Gsdmd*<sup>-/-</sup> samples for mocks or on day 3 or day 7 were detected by ANOVA with Tukey's multiple comparisons test. **B** Representative anti-CD45 stained (brown) images for WT and *Gsdmd*<sup>-/-</sup> mouse lungs at day 7 post-infection. Red and blue boxed regions are magnified below the full lung sections and highlight cell infiltration in both WT and *Gsdmd*<sup>-/-</sup> samples. Scale bars represent 2 mm for the full lung section and 250  $\mu$ m for the magnified region.

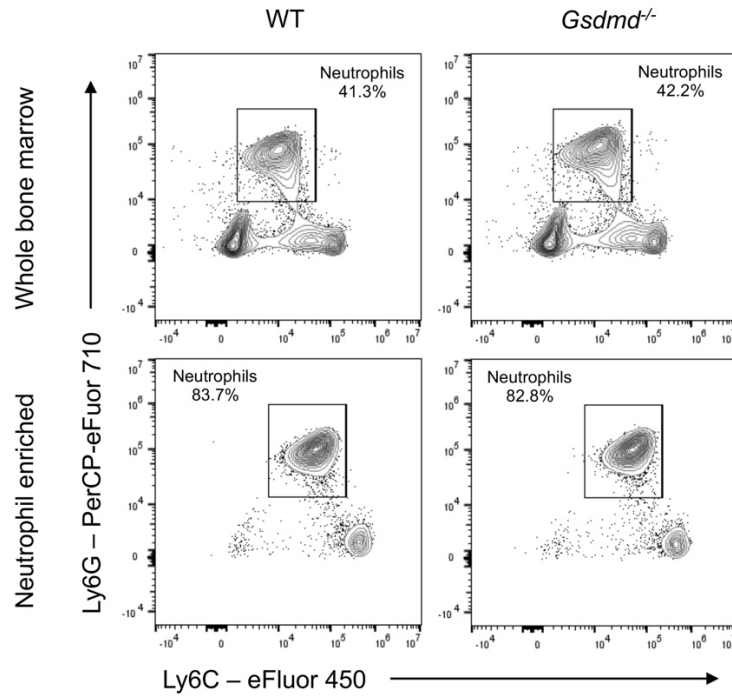

**Supplementary Figure 7: Neutrophil enrichment from WT and *Gsdmd*<sup>-/-</sup> mouse bone marrow.** Representative flow cytometry dot plots showing neutrophil enrichment for experiments in **Fig5E-G**. Upstream gating performed as in **Supplementary Figure 4**.

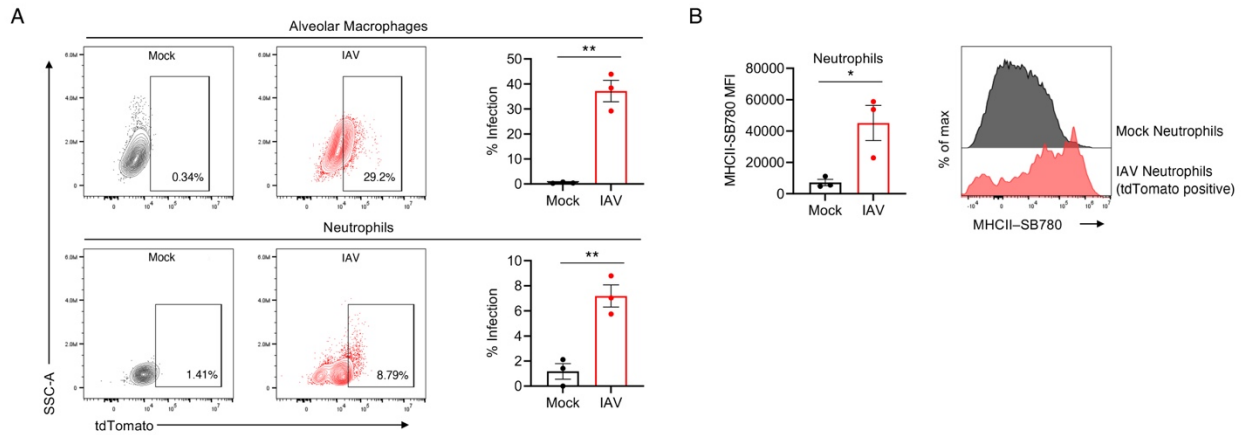

**Supplementary Figure 8: Neutrophils are infected by IAV *in vivo* and upregulate MHCII.** **A-B** Floxed allele tdTomato reporter mice were intranasally infected with 250 TCID<sub>50</sub> of PR8-Cre and sacrificed on day 7 post infection for analysis of tdTomato<sup>+</sup> immune cells in the lungs via flow cytometry. **A** Representative flow plots showing levels of infection in macrophages, neutrophils. Upstream gating performed as in **Supplementary Figure 4**. Data quantified in bar graphs to the right (n = 3 mock and IAV-infected mice, \*p < 0.05, unpaired t-test). **B** Representative histogram showing MHCII mean fluorescence intensity for neutrophils from mock animals and for tdTomato positive neutrophils from IAV-infected animals. Mean fluorescence intensity (MFI) for MHCII detection for these two populations is quantified in the bar graph (n = 3 mock and infected mice, \*p < 0.05, unpaired t-test).



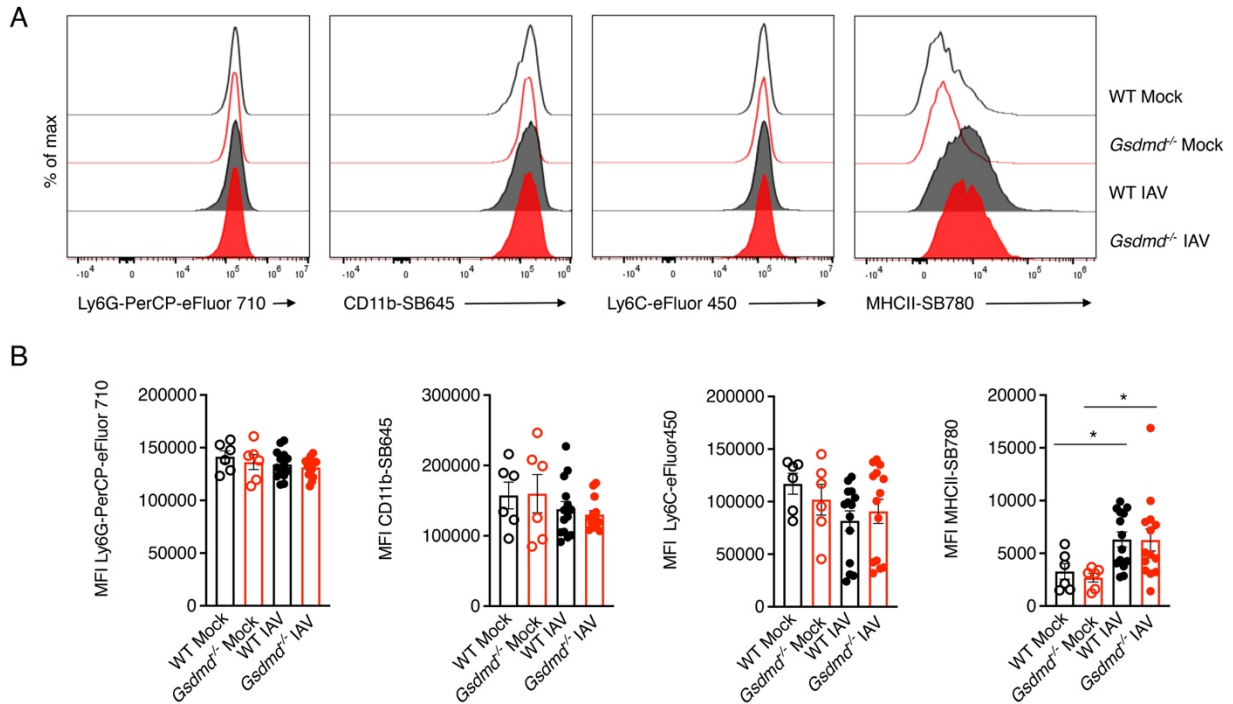

**Supplementary Figure 9: Analysis of neutrophil levels of surface markers following IAV infection. A-B** Further analysis of neutrophils from day 7 flow cytometry data in **Fig5C**. **A** Representative histograms showing mean fluorescence of neutrophil markers in WT and *Gsdmd*<sup>-/-</sup> mice. **B** Quantification of mean fluorescence intensity (MFI) for the indicated markers as in **A** (n=6 mocks and n=14 infected mice, error bars indicate SEM, statistical significance was not achieved for any comparisons by ANOVA followed by Tukey's multiple comparisons test, statistical significance (p < 0.05) was observed by unpaired t-test comparing MHCII MFI for WT Mock versus WT IAV and *Gsdmd*<sup>-/-</sup> mock versus *Gsdmd*<sup>-/-</sup> IAV).

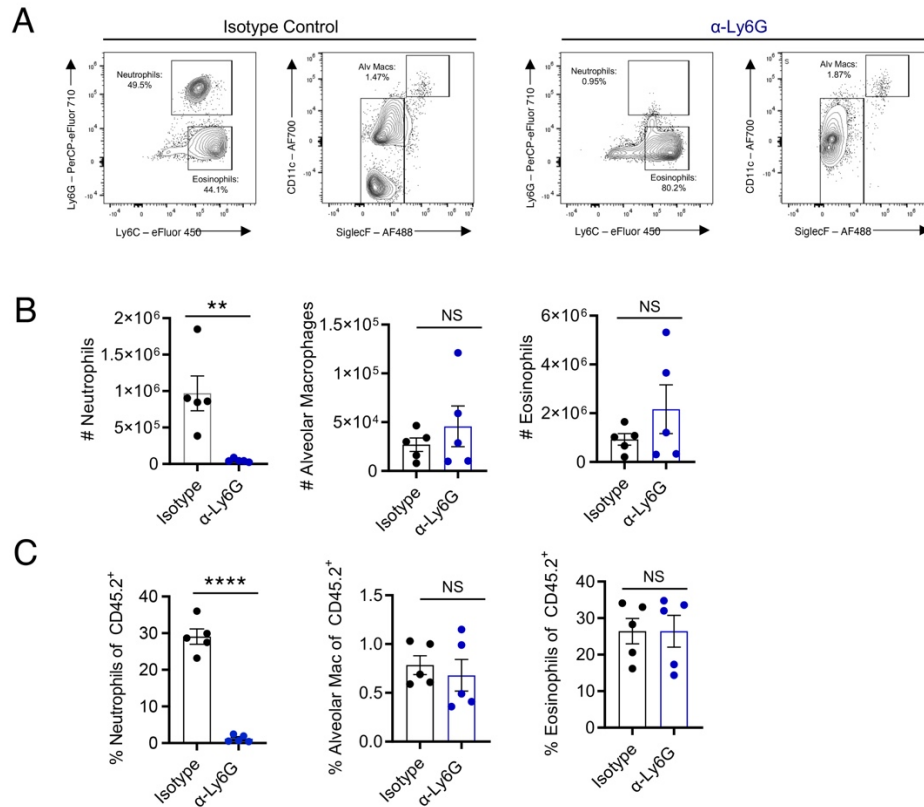

**Supplementary Figure 10: Anti-Ly6G antibody treatment selectively depletes neutrophils.**

**A-C** WT mice were infected as in **Fig 6A**. **A** Representative flow cytometry plots showing neutrophil, eosinophil, and alveolar macrophage gating from lungs on day 5 post infection. Antibody target-fluorophore combinations and upstream gating are as in **Supplementary Figure 4**. **B** Neutrophil, eosinophil, and alveolar macrophage total number (#) in the lung on day 5 post infection of n=5 mice (\*\*p < 0.01, NS, not significant, unpaired t-test). Neutrophil # data is repeated from **Fig 6B** in main text. **C** Neutrophil, eosinophil, and alveolar macrophage percentage of all CD45.2<sup>+</sup> cells in the lung on day 5 post infection of n=5 mice (\*\*\*\*p < 0.0001, NS, not significant, unpaired t-test). **B,C** Each dot represents measurements from an individual mouse, error bars indicate SEM.

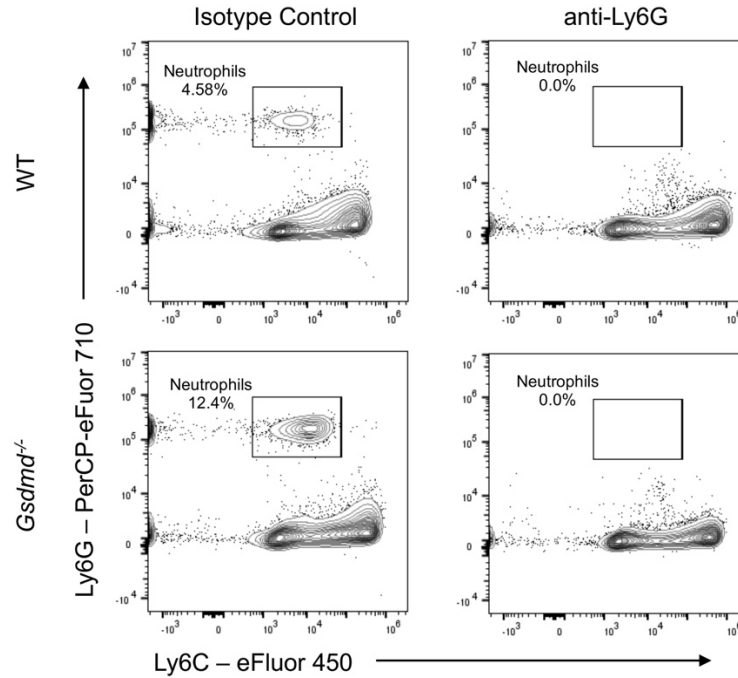

**Supplementary Figure 11: Anti-Ly6G antibody treatment depletes neutrophils in *Gsdmd*<sup>-/-</sup> mice as expected.** Representative flow cytometry dot plots showing neutrophil gating of single-cell suspensions from the lungs of mice on day 5 post infection with 50 TCID<sub>50</sub> IAV strain PR8 as in **Fig 6G**. These plots are representative of two mice randomly chosen to be sacrificed to confirm neutrophil depletion. Upstream gating performed as in **Supplementary Figure 4**.

# Full blots for Supplementary Figure 3A, left

$\alpha$ -GSDMD

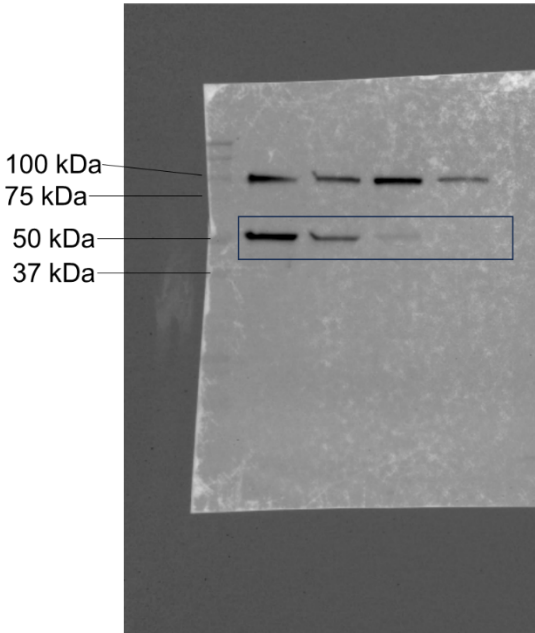

$\alpha$ -Cleaved GSDMD

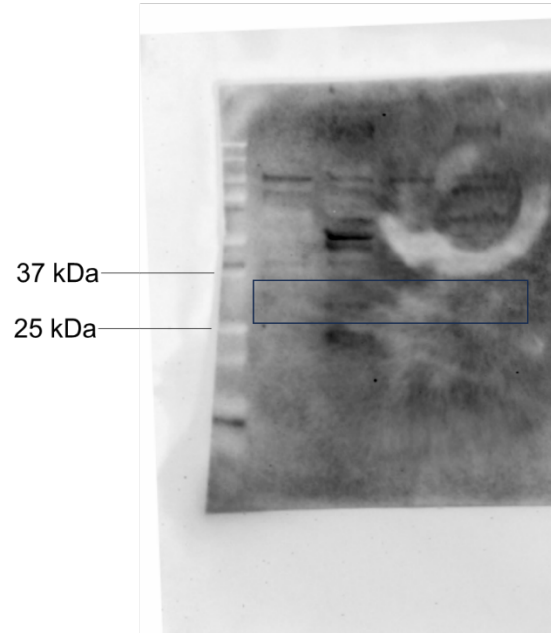

$\alpha$ -IAV NP

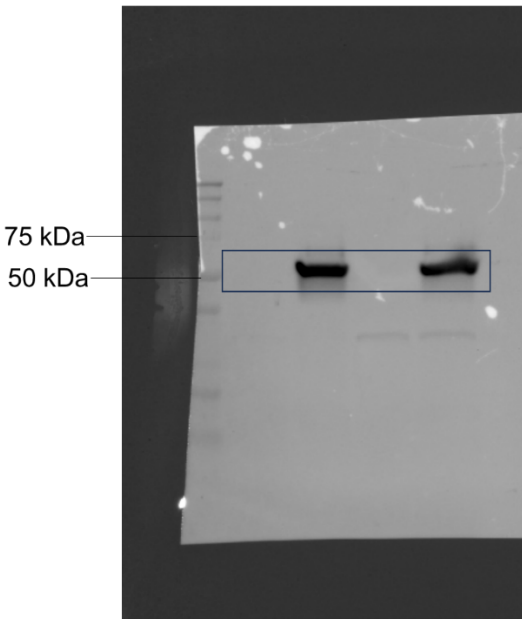

$\alpha$ -Cleaved PARP1

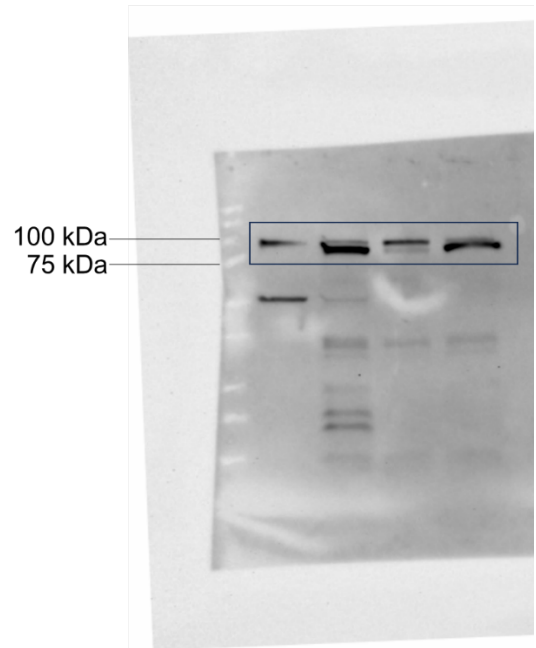

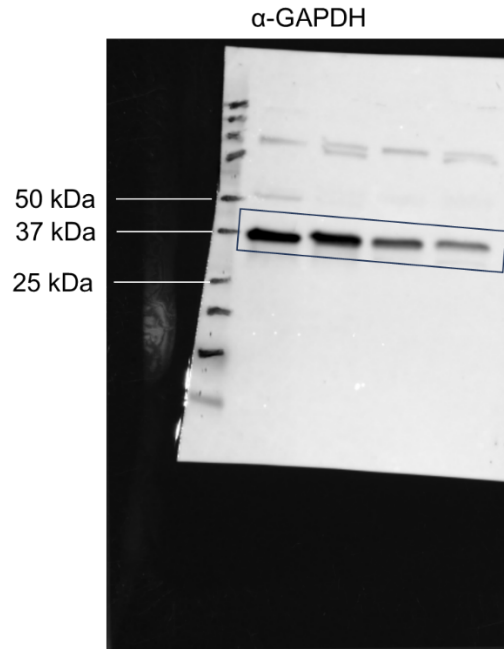

**Full blots for Supplementary Figure 3A, right**

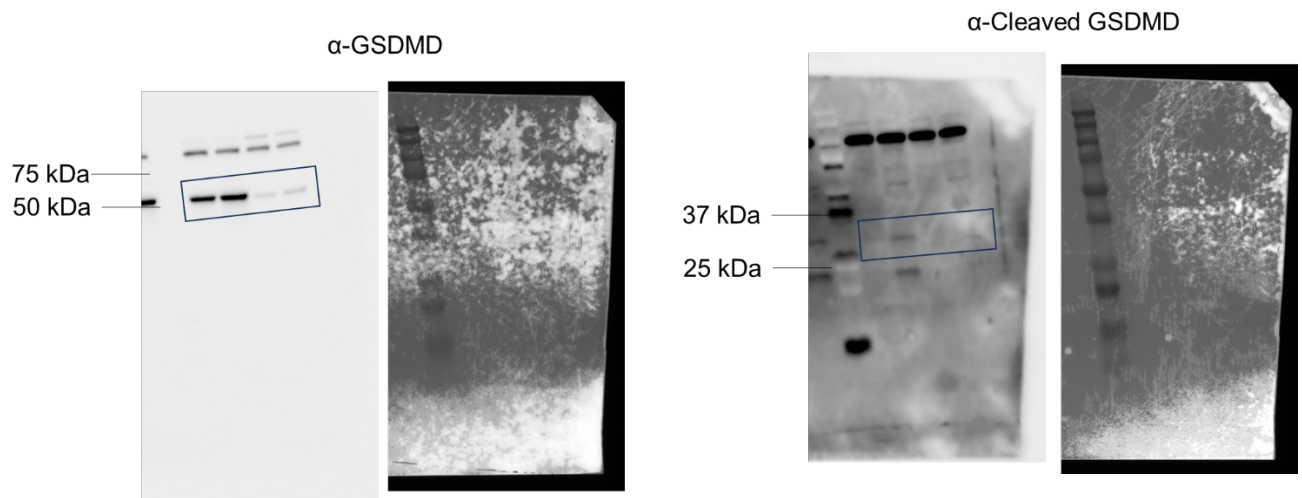

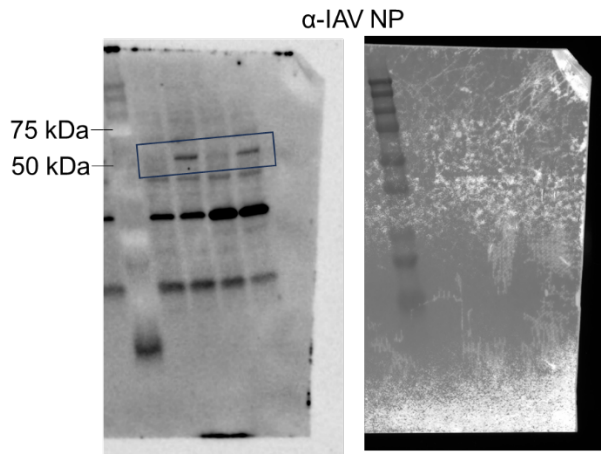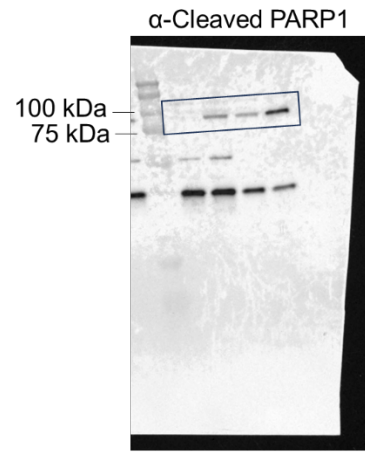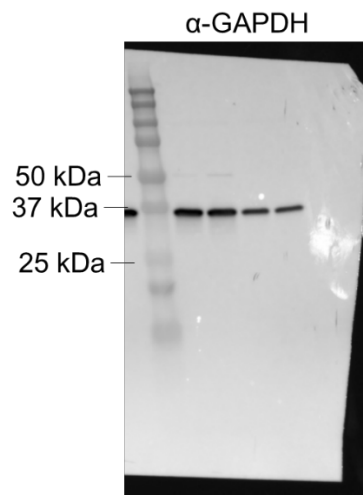

Supplement: 41467_2024_47067_MOESM1_ESM.pdf [file 41467_2024_47067_MOESM1_ESM.pdf]
