# Supplementary material for: Gasdermin D promotes influenza virus-induced mortality through neutrophil amplification of inflammation
Source: PubMed Central journal article supplement (PMC10980740; doi:10.1038/s41467-024-47067-0), 2024-03-29
Supplement: 41467_2024_47067_MOESM3_ESM.pdf [file 41467_2024_47067_MOESM3_ESM.pdf]

## Description of Additional Supplementary Files

**Supplementary Data 1:** All differentially expressed genes (lfc  $\geq 1.5$  |, adj p-value  $< 0.01$ ) comparing WT versus *Gsdmd*<sup>-/-</sup> lungs at day 7 post infection with 50 TCID<sub>50</sub> IAV strain PR8.

### **Supplementary Data 2:**

A: Differentially expressed genes associated with Defense to Virus related to Main Text Figure 4A.

B: Differentially expressed genes associated with Neutrophil Chemotaxis related to Main Text Figure 4B.

**Supplementary Data 3:** Primer sequences used for qRT-PCR.
